# Supplementary material for: Use of a Blockade-of-Binding ELISA and Microneutralization Assay to Evaluate Zika Virus Serostatus in Dengue-Endemic Areas
Source: PubMed Central journal article supplement (PMC6726926; doi:10.4269/ajtmh.19-0270), 2019-08-06
Supplement: tpmd190270.SD1.pdf [file tpmd190270.SD1.pdf]

1 **Supplemental Tables**

2 **Supplemental Table 1. Antigen specificity analysis of the Zika NS1-specific**  
3 **monoclonal antibody (mAb), clone F9, used for Zika NS1 blockade of binding**  
4 **enzyme-linked immunosorbent assay development.** Indirect ELISA was carried out  
5 by coating NS1 from different flaviviruses. Following blocking, mAb F9 was added to the  
6 plate and later detected with a species-specific conjugate. Table shows the binding of  
7 the mAb to NS1 from different flaviviruses as the optical density normalized by the  
8 signal on the ZIKV NS1.

| <b>NS1 Proteins</b> | <b>% OD450 nm of the Zika NS1 Protein</b> |
|---------------------|-------------------------------------------|
| ZIKV                | 100%                                      |
| DENV-1              | 1%                                        |
| DENV-2              | 1%                                        |
| DENV-3              | 1%                                        |
| DENV-4              | 1%                                        |
| YFV                 | 1%                                        |
| JEV                 | 1%                                        |
| TBEV                | 1%                                        |
| USUV                | 17%                                       |
| WNV                 | 1%                                        |

9 DENV, dengue virus; JEV, Japanese encephalitis virus; OD, optical density; USUV, Usutu virus; WNV, West Nile  
10 virus; YFV, yellow fever virus, ZIKV, Zika virus

11 **Supplemental Table 2. Performance characteristics of internal quality controls in the Zika NS1 BOB ELISA and**  
 12 **Zika Microneutralization assay.**

| Immunoassay                          | Internal quality control | Number of Determinations <sup>3</sup> | GMT              | %GCV <sup>1</sup> | Acceptable limits |                  |
|--------------------------------------|--------------------------|---------------------------------------|------------------|-------------------|-------------------|------------------|
|                                      |                          |                                       |                  |                   | Lower             | Upper            |
| Zika NS1 BOB<br>ELISA                | Titer high control       | 231                                   | 69.56            | 19.1%             | 49.04             | 98.66            |
|                                      | Titer low control        | 223                                   | 17.94            | 23.8%             | 11.71             | 27.47            |
|                                      | Titer negative control   | 230                                   | <10.00           | N/A <sup>2</sup>  | N/A <sup>2</sup>  | N/A <sup>2</sup> |
|                                      | mAb OD %CV               | 234                                   | 12.20%           | 66.2%             | N/A               | <30%             |
|                                      | mAb signal (OD)          | 234                                   | 2.34             | 25.0%             | 1.50              | 3.66             |
| Zika<br>Microneutralization<br>Assay | Titer control 1          | 45                                    | 282              | 60.6%             | 141               | 564              |
|                                      | Titer control 2          | 48                                    | 247              | 53.3%             | 123               | 493              |
|                                      | Titer negative control   | 34                                    | <10              | N/A <sup>2</sup>  | N/A <sup>2</sup>  | N/A <sup>2</sup> |
|                                      | TCID50                   | 45                                    | 300 <sup>4</sup> | 43.0%             | 95                | 949              |

13 CV, coefficient of variance; GCV, geometric coefficient of variation; GMT, geometric mean titer; mAb, monoclonal antibody; OD, optical density

14 <sup>1</sup>%GCV – coefficient of variance of the geometric mean

15 <sup>2</sup>N/A – Not calculated because the GMT was below the lower limit of quantitation, or no data was available for calculation

16 <sup>3</sup>Determinations refer to number of values obtained in the course of multiple weeks to establish valid ranges for each parameter evaluated

17 <sup>4</sup>GMT of TCID50 consist of a target value

18 **Supplemental Figure**

19 **Supplemental Figure S1.**

20 **Evaluation of Zika NS1 blockade of binding enzyme-linked immunosorbent assay**  
21 **performance recommended by the ICH Harmonized Tripartite guidelines** <sup>31</sup>. (A)

22 Analytical specificity analysis of the monoclonal antibody (mAb, clone F9). Heat-map  
23 shows percent inhibition of the binding of the mAb to the Zika NS1 in the microtiter  
24 ELISA plate by the homologous and heterologous competitors. Red represents  
25 competition over 50%. White represents competition at 50%, while blue represents

26 competition below 50% (B). Matrix effect analysis. Plot shows the geometric mean of  
27 the blockade titers a Zika virus positive antibody sample spiked in three concentrations  
28 on hemolytic (red circle), icteric (yellow square) and lipidic (orange triangle) matrices.

29 Blue star represent the expected geometric mean of blockade titer of the same sample  
30 analyzed at 100%. Table shows the percent recovery (%Rec) of each spike

31 concentration in relation to the expected geometric mean blockade titer (C). Accuracy  
32 analysis. Plot shows the geometric mean of the blockade titers of a Zika virus positive

33 antibody sample spiked in four concentrations with normal Zika virus antibody negative  
34 serum. Blue stars represent the expected geometric mean of blockade titer of the same

35 sample analyzed at 100%. Table shows the percent recovery (%Rec) of each spike  
36 concentration in relation to the expected geometric mean blockade titer (D). Linearity

37 and dilutability analysis. Ten samples with known blockade titers were analyzed in four  
38 concentrations covering a wide range of the assay. Plot shows the expected blockade

39 titers versus the obtained blockade titers in each concentration analyzed. Gray dashed  
40 line represent the linear regression of samples combined. For each sample, coefficient

41 of determination and slope were determined. (E). Repeatability analysis Plot shows  
42 percent geometric mean coefficient of variation (%GCV) of each measurement by three  
43 analysts in samples with a wide range of blockade titer levels. Red dotted line  
44 represents the calculated repeatability of 23.0%. (F). Intermediate precision analysis.  
45 Plot shows percent geometric mean coefficient of variation (%GCV) of each  
46 measurement in each samples by different analysts on multiple days with a wide  
47 range of blockade titer levels. Red dotted line represents the calculated intermediate  
48 precision of 23.4%. Dashed gray line represents the assay lower limit of quantitation.

49

50 <sup>1</sup>Figure E, analyst 3 only tested a subset of the sample panel used to evaluate intra-assay repeatability.

51

52

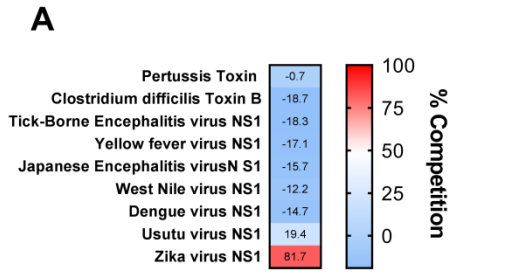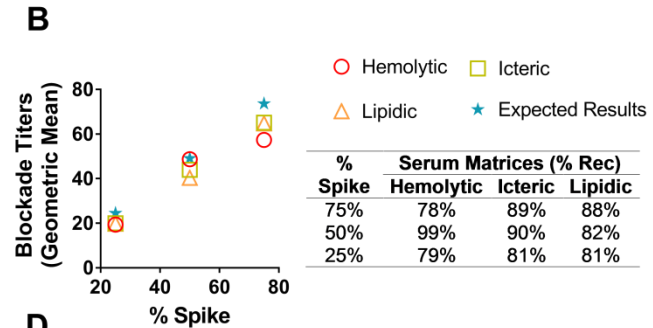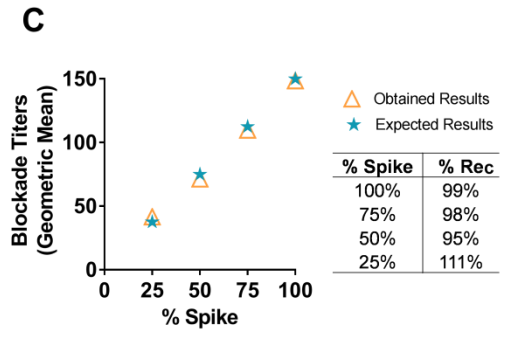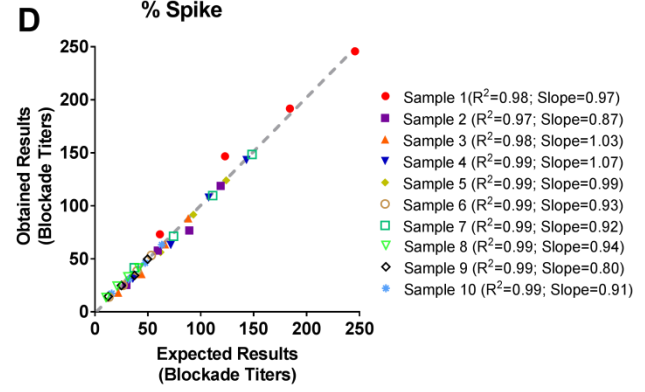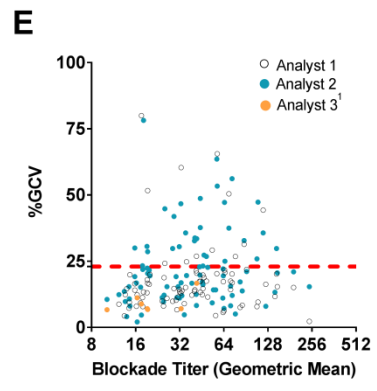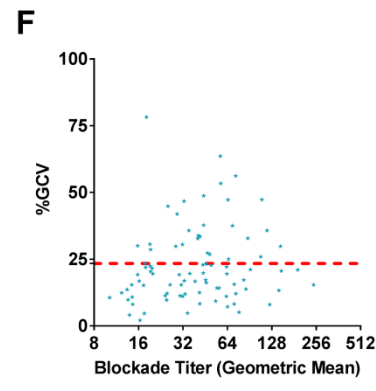

56

57 **Supplemental Figure S2. Representative blockade curves (n=36) of a ZIKV-**  
58 **positive or negative antibody sample.** The plot depicts the normalized geometric  
59 mean signal of the competition between mAb F9 and serial fold dilutions of a serum  
60 sample. The mAb F9 signal is normalized to the maximum signal observed in the  
61 absence of competing human sera sample. Geometric mean of multiple blockade  
62 curves of a Zika-negative- and a Zika-positive antibody sample yielded consistent  
63 blockade titers (geometric mean titer [GMT] of the ZIKV antibody positive sample [95%  
64 confidence interval, CI] = 67.23 [65.45, 69.05]. Error bars represent the geometric  
65 standard deviation. The red dotted line represents 50% inhibition based on the  
66 maximum signal.

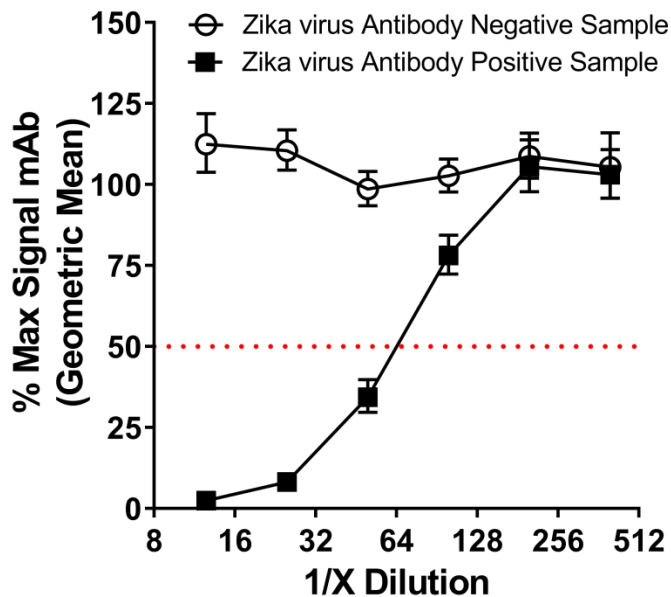

67

68

69

70 **Supplemental Figure S3. Dengue NS1 IgG levels in pre-Zika and virologically**  
71 **confirmed dengue (VCD) samples used to evaluate the specificity of the Zika NS1**  
72 **BOB ELISA.** Plot shows Dengue NS1 IgG levels for individual samples presenting  
73 (BOB+) or not (BOB-) Zika NS1 blockade titers. Red lines represent the geometric  
74 mean and standard deviation of the geometric mean, respectively. The black dotted line  
75 represents the assay lowest limit of quantitation as 9 EU/mL. Samples with dengue NS1  
76 IgG levels < 9 EU/mL were assigned an arbitrary value of 4.5 EU/mL for calculation  
77 purposes.

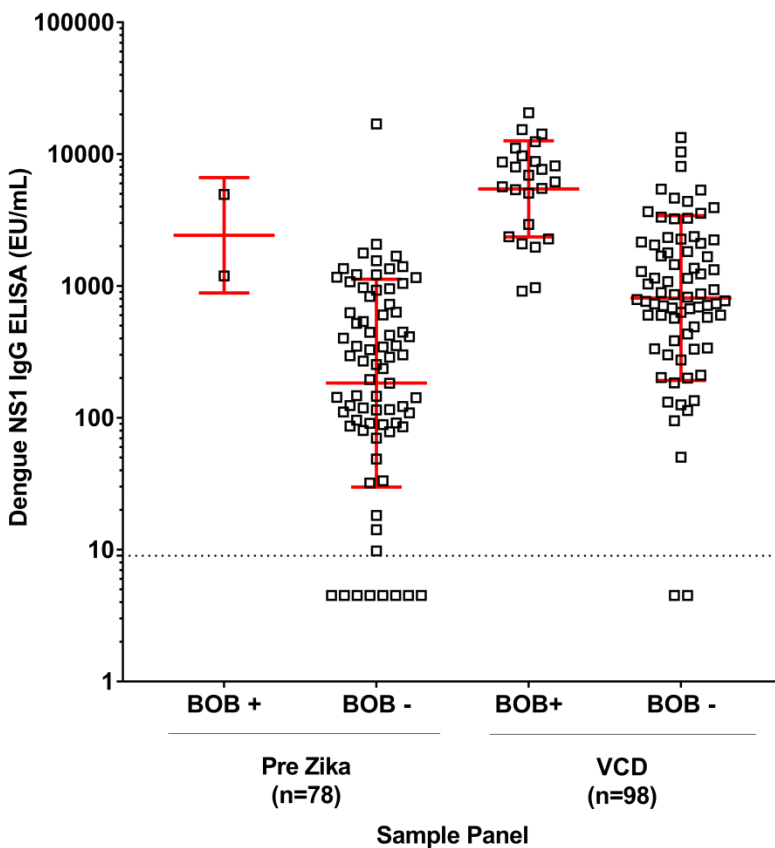

78

79

80

81

## 82 **Supplemental Material**

### 83 *Zika Immunoassay Characterization*

84 *I. Antigen Competition (Zika BOB only):* Competition studies were performed using  
85 the homologous and heterologous (related competitor: using NS1 from other  
86 flaviviruses; and unrelated competitor: *Bordetella pertussis* toxin and  
87 *Clostridium difficile* toxin B) competitors at 30µg/mL and mAb. Specificity is  
88 assessed as percent competition, calculated as  $[1 - (\text{Optical Density of the}$   
89  $\text{Competed mAb} \div \text{Optical Density of the Uncompeted mAb})] \times 100\%$ .

90 *II. Serum Competition (Zika MN only):* Anti-ZIKV positive human serum samples  
91 were spiked with samples containing known antibodies to: Yellow Fever virus  
92 (YFV), Japanese Encephalitis virus (JEV), West Nile virus (WNV) and/or  
93 Dengue virus (DENV) and anti-ZIKV negative human serum (baseline  
94 control). Percentage of samples with percent recovery within  $\pm 50\%$  of the  
95 expected value for each spiked sample was then calculated.

96 *III. Matrix Effect:* Spike recovery of characterized ZIKV antibody positive samples  
97 available commercially (ABO Pharmaceuticals, San Diego, USA) diluted into  
98 hemolytic (Rockland, Limerick, USA), lipidic (Calbiochem, Temecula, USA),  
99 icteric (Calbiochem, Temecula, USA) matrices. For Zika BOB, ZIKV samples  
100 were prepared at 75% (v/v), 50% (v/v) and 25% (v/v). Percent recovery  
101 (%Rec) is calculated as  $(\text{Observed Result} \div \text{Expected Result}) \times 100\%$ . *For*  
102 *Zika MN, ZIKV samples were prepared only at 50% (v/v) in each matrix.*  
103 Percentage of samples with percent recovery within  $\pm 50\%$  of the expected  
104 value for each spiked sample was then calculated.



105 *IV. Accuracy:* Spike recovery of characterized ZIKV antibody positive samples  
106 available commercially (ABO Pharmaceuticals, San Diego, USA) into ZIKV  
107 antibody negative matrices. For Zika BOB, %Rec was calculated as shown  
108 above. For Zika MN, the percentage of samples with percent recovery within  
109  $\pm 50\%$  of the expected GMT was calculated.

110 *V. Precision:* Precision of the assay was assessed using a panel of 100 ZIKV  
111 antibody positive samples (from commercial source [ABO Pharmaceuticals,  
112 San Diego, USA ] and CYD15 phase III efficacy clinical trial) spanning a wide  
113 range of concentrations and tested by multiple analysts to generate replicate  
114 results within runs (repeatability), as well as across runs (intermediate  
115 precision). Both repeatability and intermediate precision are assessed using  
116 the geometric coefficient of variation (GCV) expressed as a percentage,  
117 %GCV, for both Zika BOB and Zika MN.

118 *VI. LLOQ Establishment and Verification:* The minimum concentration at which  
119 samples yielded determinations with suitable precision and accuracy was  
120 established as the LLOQ. The established LLOQ was challenged and verified  
121 using a panel of ZIKV antibody positive samples (ABO Pharmaceuticals, San  
122 Diego, USA) with concentrations near the LLOQ of the assay for both Zika  
123 BOB and Zika MN.

124 *VII. Linearity or Dilutability:* For both Zika BOB and Zika MN, dilutability was  
125 assessed based on spike recovery of characterized ZIKV antibody positive  
126 samples (from commercial source [ABO Pharmaceuticals, San Diego, USA ]  
127 and/or CYD15 phase III efficacy clinical trial) tested as neat (undiluted) and at

128 least three prepared dilutions. Linearity was calculated by plotting the  
129 expected result as the independent variable (x-axis) and the observed result  
130 as the dependent variable (y-axis) and fitting a linear regression. The slope  
131 and coefficient of determination ( $R^2$ ) for the linear regression was used for  
132 evaluating dilutability or linearity.

133

#### 134 *Zika Immunoassays Characterization Results*

135 I. **Zika NS1 BOB ELISA:** Supplemental Figure S3 shows the evaluation of the  
136 assay based on the ICH Harmonized Tripartite<sup>31</sup> and Clinical Laboratory and  
137 Standards Institute's EP-17<sup>43</sup> guidelines, as detailed in the methods section.  
138 Antigen analytical specificity for mAb F9 demonstrated that, within the expected  
139 variability margin for mAb binding to the coated antigen, homologous antigens  
140 inhibited over 80% of the mAb signal, while heterologous competition was  $\leq 20\%$   
141 (Figure S1A). Thus, the mAb F9 is considered specific to ZIKV NS1 protein.  
142 Moreover, ZIKV antibody-positive spiked samples into hemolytic, icteric or lipidic  
143 matrices demonstrated percent recovery of 85%, 87% and 84%, respectively  
144 (Figure S1B), suggesting the matrices evaluated did not interfere with the  
145 performance of the assay. Accuracy analysis of a sample panel with established  
146 blockade titers at different concentrations was carried out and yielded %Rec that  
147 ranged from 95% to 111% (Figure S1C). Assay linearity was evaluated using 10  
148 samples, with established blockade titers at 4 concentrations. Coefficient of  
149 determination ( $R^2$ ) and slope for all curves ranged from 0.97 to 0.99 and 0.80 to  
150 1.07, respectively (Figure S1D). Repeatability of the assay was evaluated using

151 100 samples, tested 5 times by 3 different analysts per individual run. The  
152 percent geometric coefficient of variation (%GCV) for repeatability is shown in  
153 Figure S1E. The overall assay repeatability was 23.0% (95% CI 21.8%, 24.4%),  
154 which is lower than what is the accepted range for titer-based functional assays  
155 (< 50%). Moreover, the variability of the assay taking into account different  
156 analysts performing the assay on multiple days and using different instruments  
157 was 23.4% (95% CI 21.2%, 25.7%) (Figure S1F), which within the accepted  
158 range for titer-based functional assays (< 50% GCV). The LLOQ was verified  
159 using ZIKV-positive samples with a known blockade titer ranging from below to  
160 up to 4-fold higher than the minimum sample dilution (1:10). The results indicate  
161 that among all concentrations tested, the assay intermediate precision at LLOQ  
162 level was estimated as 30.4% (95% CI 26.0%, 36.8%) (Supplemental Table 3).

163 **II. ZIKV Microneutralization Assay:** Assay specificity is summarized in  
164 Supplemental Table 4. The percentage of samples with observed GMT within  $\pm$   
165 50% of the expected value for each spiked sample were 90.0% (9/10) for YFV-  
166 spiked samples, 90.0% (9/10) for JEV-spiked samples, 100.0% (10/10) for WNV-  
167 spiked samples and 90.0% for DEN Sample 1-spiked samples. However, DENV  
168 positive samples 2, demonstrated 40.0% (4/10) and 20.0% (2/10) of the samples,  
169 respectively, exhibited percent differences (expected versus observed GMT)  
170 within the range  $\pm$  50.0% of expected GMT. These results indicate that the ZIKV  
171 MN assay exhibits potential cross-reactivity with sera containing anti-DENV  
172 antibodies, but not with antibodies to other tested flaviviruses (YFV, JEV and  
173 WNV). The results of the serum matrix effect study to evaluate ZIKV MN assay

174 specificity are summarized in Supplemental Table 5. Results shows that 80.0%  
175 (8/10), 90.0% (9/10) and 100.0% (10/10) of the samples had the percent  
176 difference within  $\pm 50\%$  of samples spiked with icteric, hemolytic and lipemic  
177 matrices, respectively. These results indicate that samples tested in the ZIKV MN  
178 assay are not affected by serum matrix interferents. The results of dilutional  
179 accuracy and dilutability are summarized in Supplemental Table 6. Sample 10  
180 diluted 1:20 had an expected GMT less than LLOQ (10) and, thus, excluded from  
181 analysis. In addition, only one valid result was obtained for undilute sample 10.  
182 Sample 10, undilute was included in the statistical analysis. The estimation of  
183 expected value for Sample 10 dilutions may have been significantly impacted by  
184 the variation of the assay. The percentage of samples with observed GMT within  
185  $\pm 50\%$  of the expected GMT were 90.0% (9/10) for dilutions at 1:5, 80.0% (8/10)  
186 for dilutions at 1:10 and 88.9% (8/9) for dilutions at 1:20. Overall, 86.2% (25/29)  
187 of samples/dilutions had observed GMT with  $\pm 50\%$  of the expected GMT. The  
188 Intra-assay precision results were generated by testing 42 human serum  
189 samples with Zika antibody titers that cover the range of the assay, five times  
190 each in a single assay run. The overall %GCV was 54.4% with a 95% confidence  
191 interval of (50.5%, 58.8%) which was within the expected precision of 60% GCV.  
192 A precision profile plot for repeatability is shown in Supplemental Figure 3. Intra-  
193 assay precision for ZIKV MN assay is established as %GCV  $\leq 60\%$ . Intermediate  
194 Precision was determined by testing 42 human serum samples in 3 independent  
195 assay runs by at least two different analysts. The overall %GCV for intermediate  
196 precision was 55.3% with a 95% confidence interval of (51.0%, 60.3%) which

197 was within the expected precision of 60% GCV. A precision profile plot for  
198 intermediate precision is shown in Supplemental Figure S4. Intermediate  
199 precision for ZIKV MN assay is established as  $\%GCV \leq 60\%$ . The results of  
200 LLOQ determination are summarized in Supplemental Table 7. Statistical  
201 analysis showed that for intra-assay precision (repeatability) near LLOQ, the  
202 overall  $\%GCV$  for positive samples with GMT near the expected LLOQ (i.e., 10-  
203 40) was 55.1% with a 95% confidence interval of (48.2%, 64.1%) which was  
204 within the expected precision of 60% GCV. For intermediate precision near  
205 LLOQ, the overall  $\%GCV$  for positive samples with GMT near the expected  
206 LLOQ (i.e., 10-40) was 55.3% with a 95% confidence interval of (48.4%, 64.4%)  
207 which was within the expected precision of 60% GCV.

208

209

210 **Supplemental Figure S4: Profile Plot for Precision for Zika MN**

211

212

[A] Repeatability

[B] Intermediate Precision

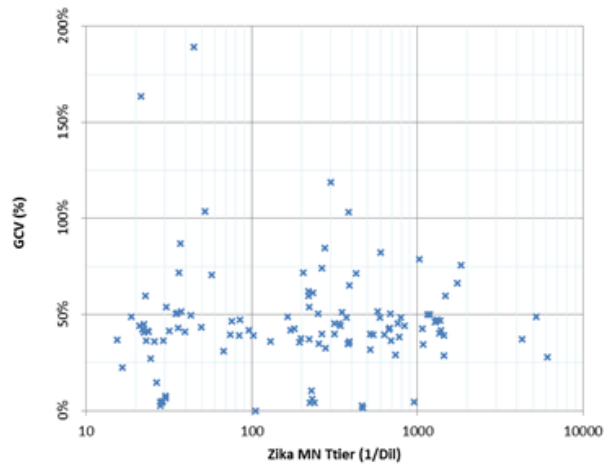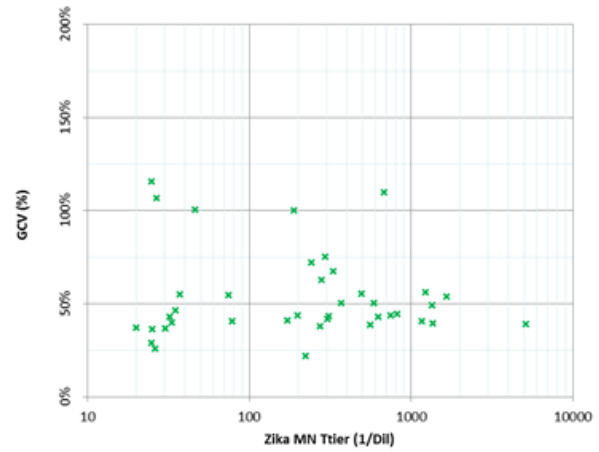

213

214

215

216 **Supplemental Table 3. Evaluation of the lower limit of quantitation of the Zika NS1**  
217 **blockade of binding enzyme-linked immunosorbent assay.**

| Sample ID | GMT  | CV (%)           |                  |                  | CV (%)<br>(Overall) |
|-----------|------|------------------|------------------|------------------|---------------------|
|           |      | Analyst 1        | Analyst 2        | Analyst 3        |                     |
| Sample 1  | <10  | N/D <sup>1</sup> | N/D <sup>1</sup> | N/D <sup>1</sup> | N/D <sup>1</sup>    |
| Sample 2  | <10  | N/D <sup>1</sup> | N/D <sup>1</sup> | N/D <sup>1</sup> | N/D <sup>1</sup>    |
| Sample 3  | 10.2 | 10.6%            | N/D <sup>1</sup> | 6.7%             | 38.7%               |
| Sample 4  | <10  | N/D <sup>1</sup> | N/D <sup>1</sup> | N/D <sup>1</sup> | N/D <sup>1</sup>    |
| Sample 5  | 16.4 | 2.1%             | 12.3%            | 11.2%            | 13.3%               |
| Sample 6  | 17.5 | 4.7%             | 80.0%            | 8.9%             | 45.3%               |
| Sample 7  | 19.3 | 28.6%            | 51.7%            | 6.8%             | 39.2%               |
| Sample 8  | 19.2 | 22.4%            | 18.0%            | 7.1%             | 15.1%               |
| Sample 9  | 32.7 | 16.9%            | 60.4%            | 7.1%             | 33.3%               |
| Sample 10 | 41.8 | 33.5%            | 20.5%            | 16.7%            | 27.9%               |

218 CV, coefficient of variance; GMT, geometric mean titer

219 <sup>1</sup>N/D – Not determined because the GMT is <lower limit of quantitation or no data available for calculation

220

221

223 **Supplemental Table 4: Summary of ZIKV MN Assay Specificity by Serum Spiking**

| Sample ID | Matrix          | Results (1/Dilution) |              |              | Geometric Mean Titer (1/Dil) | % Difference (Observed vs. Expected GMT) |
|-----------|-----------------|----------------------|--------------|--------------|------------------------------|------------------------------------------|
|           |                 | Replicate #1         | Replicate #2 | Replicate #3 |                              |                                          |
| Sample 1  | Negative Sample | 56                   | 57           | 37           | 49.1                         | ND                                       |
|           | YFV Sample      | 57                   | 58           | UTDT         | 57.5                         | 17.2%                                    |
|           | JEV Sample      | 57                   | 51           | 61           | 56.2                         | 14.5%                                    |
|           | WNV Sample      | 56                   | 58           | 58           | 57.3                         | 16.8%                                    |
|           | DEN-Sample 1    | 58                   | 29           | 28           | 36.1                         | -26.4%                                   |
|           | DEN-Sample 2    | 109                  | 110          | 213          | 136.7                        | 178.6% ‡                                 |
|           | DEN-Sample 3    | UTDT                 | 394          | UTDT         | 394.0                        | 703.0% ‡                                 |
| Sample 2  | Negative Sample | 224                  | 223          | 223          | 223.3                        | ND                                       |
|           | YFV Sample      | 229                  | 216          | 220          | 221.6                        | -0.8%                                    |
|           | JEV Sample      | 230                  | 116          | 229          | 182.8                        | -18.1%                                   |
|           | WNV Sample      | 239                  | 227          | 232          | 232.6                        | 4.2%                                     |
|           | DEN-Sample 1    | 118                  | 235          | 116          | 147.6                        | -33.9%                                   |
|           | DEN-Sample 2    | 453                  | 433          | UTDT         | 442.9                        | 98.3% ‡                                  |
|           | DEN-Sample 3    | 905                  | 257          | 800          | 570.9                        | 155.6% ‡                                 |
| Sample 3  | Negative Sample | 243                  | 229          | 229          | 233.6                        | ND                                       |
|           | YFV Sample      | 234                  | 184          | 230          | 214.7                        | -8.1%                                    |
|           | JEV Sample      | 438                  | 177          | 228          | 260.5                        | 11.5%                                    |
|           | WNV Sample      | 154                  | 208          | 454          | 244.1                        | 4.5%                                     |
|           | DEN-Sample 1    | 227                  | 212          | 146          | 191.5                        | -18.0%                                   |
|           | DEN-Sample 2    | 446                  | 444          | 460          | 449.9                        | 92.6% ‡                                  |
|           | DEN-Sample 3    | 1493                 | 855          | 902          | 1048.1                       | 348.7% ‡                                 |
| Sample 4  | Negative Sample | 920                  | 431          | 456          | 565.5                        | ND                                       |
|           | YFV Sample      | 456                  | 216          | 201          | 270.5                        | -52.2% ‡                                 |



| Sample ID | Matrix       | Results (1/Dilution) |              |              | Geometric Mean Titer (1/Dil) | % Difference (Observed vs. Expected GMT) |
|-----------|--------------|----------------------|--------------|--------------|------------------------------|------------------------------------------|
|           |              | Replicate #1         | Replicate #2 | Replicate #3 |                              |                                          |
|           | JEV Sample   | 460                  | 877          | 473          | 575.7                        | 1.8%                                     |
|           | WNV Sample   | 466                  | 891          | 472          | 580.9                        | 2.7%                                     |
|           | DEN-Sample 1 | 393                  | 248          | 449          | 352.4                        | -37.7%                                   |
|           | DEN-Sample 2 | 952                  | 839          | 879          | 888.8                        | 57.2% ‡                                  |
|           | DEN-Sample 3 | 428                  | 3322         | UTDT         | 1192.4                       | 110.9% ‡                                 |
|           |              | Negative Sample      | 954          | 882          | UTDT                         | 917.3                                    |
| Sample 5  | YFV Sample   | UTDT                 | 1676         | 898          | 1226.8                       | 33.7%                                    |
|           | JEV Sample   | 1722                 | UTDT         | 902          | 1246.3                       | 35.9%                                    |
|           | WNV Sample   | 1816                 | 841          | UTDT         | 1235.8                       | 34.7%                                    |
|           | DEN-Sample 1 | 966                  | 1747         | 892          | 1146.1                       | 24.9%                                    |
|           | DEN-Sample 2 | 428                  | 464          | 1678         | 693.3                        | -24.4%                                   |
|           | DEN-Sample 3 | 754                  | 1761         | UTDT         | 1152.3                       | 25.6%                                    |
|           |              | Negative Sample      | <10          | <10          | <10                          | <10                                      |
| Sample 6  | YFV Sample   | <10                  | <10          | <10          | <10                          | N/A §                                    |
|           | JEV Sample   | <10                  | <10          | <10          | <10                          | N/A §                                    |
|           | WNV Sample   | <10                  | <10          | <10          | <10                          | N/A §                                    |
|           | DEN-Sample 1 | <10                  | <10          | <10          | <10                          | N/A §                                    |
|           | DEN-Sample 2 | 56                   | 15           | 27           | 28.3                         | N/A §                                    |
|           | DEN-Sample 3 | 53                   | 66           | 27           | 45.5                         | N/A §                                    |
|           |              | Negative Sample      | 217          | 220          | 104                          | 170.6                                    |
| Sample 7  | YFV Sample   | 220                  | 216          | 117          | 177.2                        | 3.8%                                     |
|           | JEV Sample   | UTDT                 | 223          | 224          | 223.5                        | 31.0%                                    |
|           | WNV Sample   | 211                  | UTDT         | UTDT         | 211.0                        | 23.7%                                    |
|           | DEN-Sample 1 | 103                  | 112          | 105          | 106.6                        | -37.5%                                   |
|           | DEN-Sample 2 | 215                  | 219          | 208          | 214.0                        | 25.4%                                    |
|           | DEN-Sample 3 | 212                  | 249          | 437          | 284.7                        | 66.9% ‡                                  |
|           |              | Negative             | 54           | 54           | 106                          | 67.6                                     |

| Sample ID | Matrix          | Results (1/Dilution) |              |              | Geometric Mean Titer (1/Dil) | % Difference (Observed vs. Expected GMT) |
|-----------|-----------------|----------------------|--------------|--------------|------------------------------|------------------------------------------|
|           |                 | Replicate #1         | Replicate #2 | Replicate #3 |                              |                                          |
| 8         | Sample          |                      |              |              |                              |                                          |
|           | YFV Sample      | 83                   | 103          | 107          | 97.1                         | 43.6%                                    |
|           | JEV Sample      | 111                  | 108          | 52           | 85.4                         | 26.3%                                    |
|           | WNV Sample      | 54                   | 107          | 150          | 95.3                         | 41.0%                                    |
|           | DEN-Sample 1    | 110                  | 110          | 107          | 109.0                        | 61.2% ‡                                  |
|           | DEN-Sample 2    | 456                  | 218          | 234          | 285.5                        | 322.2% ‡                                 |
|           | DEN-Sample 3    | 438                  | UTDT         | 894          | 625.8                        | 825.5% ‡                                 |
| Sample 9  | Negative Sample | 217                  | 228          | 107          | 174.3                        | ND                                       |
|           | YFV Sample      | 222                  | 110          | 77           | 123.4                        | -29.2%                                   |
|           | JEV Sample      | 113                  | 104          | 110          | 108.9                        | -37.5%                                   |
|           | WNV Sample      | 109                  | 106          | 225          | 137.5                        | -21.1%                                   |
|           | DEN-Sample 1    | 123                  | 107          | 110          | 113.1                        | -35.1%                                   |
|           | DEN-Sample 2    | 425                  | 221          | 217          | 273.2                        | 56.7% ‡                                  |
|           | DEN-Sample 3    | 218                  | 236          | 223          | 225.5                        | 29.4%                                    |
| Sample 10 | Negative Sample | 438                  | 465          | 220          | 355.2                        | ND                                       |
|           | YFV Sample      | 219                  | 419          | 204          | 265.5                        | -25.2%                                   |
|           | JEV Sample      | 441                  | 214          | UTDT         | 307.2                        | -13.5%                                   |
|           | WNV Sample      | UTDT                 | 440          | 350          | 392.4                        | 10.5%                                    |
|           | DEN-Sample 1    | 143                  | 458          | 222          | 244.1                        | -31.3%                                   |
|           | DEN-Sample 2    | 220                  | UTDT         | 446          | 313.2                        | -11.8%                                   |
|           | DEN-Sample 3    | 452                  | 914          | UTDT         | 642.8                        | 81.0% ‡                                  |
| Sample 11 | Negative Sample | 435                  | 534          | 433          | 465.1                        | ND                                       |
|           | YFV Sample      | 221                  | 963          | 915          | 579.6                        | 24.6%                                    |

| Sample ID | Matrix       | Results (1/Dilution) |              |              | Geometric Mean Titer (1/Dil) | % Difference (Observed vs. Expected GMT) |
|-----------|--------------|----------------------|--------------|--------------|------------------------------|------------------------------------------|
|           |              | Replicate #1         | Replicate #2 | Replicate #3 |                              |                                          |
|           | JEV Sample   | 444                  | 913          | 844          | 699.4                        | 50.4% ‡                                  |
|           | WNV Sample   | 447                  | 423          | 912          | 556.6                        | 19.7%                                    |
|           | DEN-Sample 1 | 456                  | 303          | 434          | 391.4                        | -15.8%                                   |
|           | DEN-Sample 2 | 678                  | 841          | 492          | 654.6                        | 40.8%                                    |
|           | DEN-Sample 3 | 1800                 | 854          | 1814         | 1407.5                       | 202.7% ‡                                 |

224 ‡Percent recovery >50%

225 §N/A, not applicable as observed GMT was <10

226 UTDT – Unable to be determined

227 ND – Not determined because only observed values were determined

228

230 **Supplemental Table 5: Summary of ZIKV MN Assay Specificity by Matrix Effect**

| Sample ID | Matrix    | Results (1/Dil) |              |              | Geometric Mean Titer (1/Dil) | % Difference (Observed vs. Expected GMT) |
|-----------|-----------|-----------------|--------------|--------------|------------------------------|------------------------------------------|
|           |           | Replicate #1    | Replicate #2 | Replicate #3 |                              |                                          |
| Sample 1  | Negative  | 58              | 28           | 57           | 45.2                         | ND                                       |
|           | Hemolytic | 62              | 56           | 57           | 58.3                         | 28.8%                                    |
|           | Icteric   | 60              | 57           | 27           | 45.2                         | -0.1%                                    |
|           | Lipemic   | 56              | 59           | 58           | 57.7                         | 27.4%                                    |
| Sample 2  | Negative  | 233             | 230          | 111          | 181.2                        | ND                                       |
|           | Hemolytic | 242             | 107          | 224          | 179.7                        | -0.8%                                    |
|           | Icteric   | 195             | 170          | 124          | 160.2                        | -11.6%                                   |
|           | Lipemic   | 230             | 117          | 227          | 182.8                        | 0.9%                                     |
| Sample 3  | Negative  | 489             | 328          | 222          | 329.0                        | ND                                       |
|           | Hemolytic | 238             | 472          | 478          | 377.3                        | 14.7%                                    |
|           | Icteric   | 475             | 222          | 471          | 367.6                        | 11.7%                                    |
|           | Lipemic   | UTDT†           | 461          | 120          | 235.2                        | -28.5%                                   |
| Sample 4  | Negative  | 918             | 470          | 928          | 737.0                        | ND                                       |
|           | Hemolytic | 924             | 481          | 950          | 750.2                        | 1.8%                                     |
|           | Icteric   | 966             | 921          | 942          | 942.8                        | 27.9%                                    |
|           | Lipemic   | 475             | 912          | 515          | 606.5                        | -17.7%                                   |
| Sample 5  | Negative  | 832             | 1843         | 1798         | 1402.2                       | ND                                       |
|           | Hemolytic | UTDT            | 920          | 1850         | 1304.6                       | -7.0%                                    |
|           | Icteric   | 1083            | 983          | 936          | 998.8                        | -28.8%                                   |
|           | Lipemic   | 973             | 904          | 1877         | 1181.9                       | -15.7%                                   |
| Sample 6  | Negative  | <10             | <10          | <10          | <10                          | ND                                       |
|           | Hemolytic | <10             | <10          | <10          | <10                          | N/A ‡                                    |
|           | Icteric   | <10             | <10          | <10          | <10                          | N/A ‡                                    |
|           | Lipemic   | <10             | <10          | <10          | <10                          | N/A ‡                                    |
| Sample 7  | Negative  | 124             | 228          | 461          | 235.3                        | ND                                       |
|           | Hemolytic | 237             | UTDT         | 228          | 232.5                        | -1.2%                                    |

| Sample ID | Matrix    | Results (1/Dil) |              |              | Geometric Mean Titer (1/Dil) | % Difference (Observed vs. Expected GMT) |
|-----------|-----------|-----------------|--------------|--------------|------------------------------|------------------------------------------|
|           |           | Replicate #1    | Replicate #2 | Replicate #3 |                              |                                          |
|           | Icteric   | 474             | 221          | UTDT         | 323.7                        | 37.5%                                    |
|           | Lipemic   | 119             | 197          | 211          | 170.4                        | -27.6%                                   |
| Sample 8  | Negative  | 234             | 223          | 110          | 179.0                        | ND                                       |
|           | Hemolytic | 225             | 226          | 230          | 227.0                        | 26.8%                                    |
|           | Icteric   | 229             | 223          | 115          | 180.4                        | 0.8%                                     |
|           | Lipemic   | 117             | 114          | 116          | 115.7                        | -35.4%                                   |
| Sample 9  | Negative  | UTDT            | 109          | 113          | 111.0                        | ND                                       |
|           | Hemolytic | 241             | 217          | UTDT         | 228.7                        | 106.1% §                                 |
|           | Icteric   | 241             | 218          | 228          | 228.8                        | 106.2% §                                 |
|           | Lipemic   | 231             | 138          | 233          | 195.1                        | 75.8%                                    |
| Sample 10 | Negative  | UTDT            | 460          | 234          | 328.1                        | N/A                                      |
|           | Hemolytic | 882             | 919          | 894          | 898.2                        | 173.8% §                                 |
|           | Icteric   | 111             | 588          | 454          | 309.4                        | -5.7%                                    |
|           | Lipemic   | 460             | 280          | 644          | 436.1                        | 32.9%                                    |
| Sample 11 | Negative  | 441             | 946          | 451          | 573.0                        | ND                                       |
|           | Hemolytic | UTDT            | 440          | 457          | 448.4                        | -21.7%                                   |
|           | Icteric   | 474             | 442          | 920          | 577.6                        | 0.8%                                     |
|           | Lipemic   | 495             | 893          | 484          | 598.1                        | 4.4%                                     |

231 ‡N/A, not applicable as observed GMT was < 10

232 §Percent difference > 50%

233 ND – Not determined because only observed values were determined

234

236 **Supplemental Table 6: Summary of Dilutability of Individual Samples for ZIKV MN Assay**

| Sample ID | Dilution | Results (1:Dilution) |        |        |        |        | Expected GMT | Observed GMT | % Difference (Observed vs. Expected GMT) |
|-----------|----------|----------------------|--------|--------|--------|--------|--------------|--------------|------------------------------------------|
|           |          | Rep #1               | Rep #2 | Rep #3 | Rep #4 | Rep #5 |              |              |                                          |
| Sample 1  | Undilute | UTDT                 | 1223   | 1793   | 1785   | 1109   | N/A          | 1443.4       | ND                                       |
|           | 1/5      | 377                  | 462    | 231    | 285    | 227    | 288.7        | 304.2        | 5.4%                                     |
|           | 1/10     | 225                  | 226    | 192    | 122    | 86     | 144.3        | 159.3        | 10.3%                                    |
|           | 1/20     | 102                  | UTDT   | 118    | 114    | 58     | 72.2         | 94.5         | 30.9%                                    |
| Sample 2  | Undilute | 1806                 | 1446   | 1854   | 910    | <10    | N/A          | 1448.8       | ND                                       |
|           | 1/5      | 220                  | 233    | 235    | 230    | 217    | 289.8        | 226.9        | -21.7%                                   |
|           | 1/10     | 110                  | 116    | 57     | 56     | UTDT   | 144.9        | 79.9         | -44.9%                                   |
|           | 1/20     | 56                   | 58     | 58     | 29     | 57     | 72.4         | 50.0         | -31.0%                                   |
| Sample 3  | Undilute | 985                  | 1850   | 1705   | 923    | 1838   | N/A          | 1394.4       | ND                                       |
|           | 1/5      | 229                  | 227    | 228    | 121    | 822    | 278.9        | 259.6        | -6.9%                                    |
|           | 1/10     | 114                  | 98     | 116    | 114    | 457    | 139.4        | 146.5        | 5.1%                                     |
|           | 1/20     | 57                   | 32     | 58     | 35     | 114    | 69.7         | 53.1         | -23.8%                                   |
| Sample 4  | Undilute | 1848                 | 1802   | 919    | 1806   | 886    | N/A          | 1374.0       | ND                                       |
|           | 1/5      | 120                  | 228    | 225    | 231    | 217    | 274.8        | 198.6        | -27.7%                                   |
|           | 1/10     | 114                  | 121    | 111    | 114    | 114    | 137.4        | 114.8        | -16.5%                                   |
|           | 1/20     | 56                   | 60     | 56     | 56     | 56     | 68.7         | 56.8         | -17.4%                                   |
| Sample 5  | Undilute | 1818                 | 915    | 934    | UTDT   | 1751   | N/A          | 1284.3       | ND                                       |
|           | 1/5      | 399                  | 231    | 226    | 122    | 225    | 256.9        | 224.6        | -12.6%                                   |

| Sample ID | Dilution | Results (1:Dilution) |        |        |        |        | Expected GMT | Observed GMT | % Difference (Observed vs. Expected GMT) |
|-----------|----------|----------------------|--------|--------|--------|--------|--------------|--------------|------------------------------------------|
|           |          | Rep #1               | Rep #2 | Rep #3 | Rep #4 | Rep #5 |              |              |                                          |
|           | 1/10     | 57                   | 113    | 114    | 54     | 115    | 128.4        | 85.5         | -33.5%                                   |
|           | 1/20     | 58                   | 58     | 30     | 54     | 57     | 64.2         | 49.9         | -22.2%                                   |
| Sample 6  | Undilute | 7274                 | UTDT   | 3667   | 3704   | 7374   | N/A          | 5195.3       | ND                                       |
|           | 1/5      | 1882                 | 1386   | 912    | 904    | 928    | 1039.1       | 1148.2       | 10.5%                                    |
|           | 1/10     | 138                  | 170    | 427    | UTDT   | 238    | 519.5        | 221.0        | -57.5% ‡                                 |
|           | 1/20     | 234                  | 181    | 148    | UTDT   | 229    | 259.8        | 194.6        | -25.1%                                   |
| Sample 7  | Undilute | 231                  | 122    | 112    | 233    | UTDT   | N/A          | 164.7        | ND                                       |
|           | 1/5      | 60                   | 54     | 56     | 34     | 29     | 32.9         | 44.7         | 35.8%                                    |
|           | 1/10     | 29                   | 28     | UTDT   | 28     | 29     | 16.5         | 28.5         | 73.0% ‡                                  |
|           | 1/20     | 16                   | 14     | 14     | <10    | 13     | 8.2          | 14.2         | 72.6% ‡                                  |
| Sample 8  | Undilute | 118                  | 246    | 451    | 444    | 230    | N/A          | 266.2        | ND                                       |
|           | 1/5      | 65                   | 60     | 56     | 57     | 58     | 53.2         | 59.1         | 11.0%                                    |
|           | 1/10     | 30                   | 58     | 28     | 29     | 29     | 26.6         | 33.3         | 25.1%                                    |
|           | 1/20     | 16                   | 15     | 14     | 14     | 29     | 13.3         | 16.9         | 26.7%                                    |
| Sample 9  | Undilute | 1825                 | 859    | UTDT   | 906    | 931    | N/A          | 1072.3       | ND                                       |
|           | 1/5      | 233                  | 155    | 235    | 118    | 237    | 214.5        | 188.4        | -12.2%                                   |
|           | 1/10     | 57                   | 103    | 58     | 56     | UTDT   | 107.2        | 66.1         | -38.4%                                   |
|           | 1/20     | 59                   | 30     | 61     | 22     | 70     | 53.6         | 44.1         | -17.8%                                   |

| Sample ID  | Dilution | Results (1:Dilution) |        |        |        |        | Expected GMT | Observed GMT | % Difference (Observed vs. Expected GMT) |
|------------|----------|----------------------|--------|--------|--------|--------|--------------|--------------|------------------------------------------|
|            |          | Rep #1               | Rep #2 | Rep #3 | Rep #4 | Rep #5 |              |              |                                          |
| Sample 10* | Undilute | UTDT                 | UTDT   | UTDT   | UTDT   | 106    | N/A          | 106.0        | ND                                       |
|            | 1/5      | 28                   | 58     | 34     | 58     | 30     | 21.2         | 39.5         | 86.3% ‡                                  |
|            | 1/10     | 13                   | 14     | 14     | 15     | 14     | 10.6         | 14.0         | 31.9%                                    |
|            | 1/20     | 24                   | <10    | 14     | 13     | <10    | <10          | 10.2         | N/A                                      |

237  
238  
239  
240  
241  
242  
243  
244  
245

‡Percent recovery > 50%  
 \*Sample 10 diluted 1:20 had an expected GMT less than LLOQ (10) and, thus, excluded from analysis. In addition, only one valid result was obtained for undilute sample 10. Sample 10, undilute was included in the statistical analysis. The estimation of expected value for Sample 10 dilutions may have been significantly impacted by the variation of the assay.  
 UTDT – Unable to be determined  
 ND – Not determined because only observed values were determined  
 N/A – Not applicable as observed GMT was < 10



246

247 **Supplemental Table 7: Summary Intra- and Inter-mediate Precision of ZIKV MN Assay on LLOQ samples**

| Sample ID | Intra-of Run #1 |        | Intra- of Run #2 |        | Intra- of Run #3 |       | Intermediate Precision |        |
|-----------|-----------------|--------|------------------|--------|------------------|-------|------------------------|--------|
|           | of the Sample   |        | of the Sample    |        | of the Sample    |       | of the Sample          |        |
|           | GMT<br>(1/Dil)  | GCV%   | GMT<br>(1/Dil)   | GCV%   | GMT<br>(1/Dil)   | GCV%  | GMT<br>(1/Dil)         | GCV%   |
| Sample 1  | 21.5            | 163.4% | 22.8             | 59.8%  | 37.2             | 87.0% | 26.6                   | 106.9% |
| Sample 2  | 28.2            | 4.7%   | 30.3             | 7.7%   | 18.7             | 49.0% | 25.2                   | 36.3%  |
| Sample 3  | 39.5            | 41.2%  | 35.1             | 50.6%  | 30.5             | 53.9% | 34.8                   | 46.7%  |
| Sample 4  | 29.3            | 36.5%  | 35.9             | 43.1%  | 35.5             | 50.7% | 33.1                   | 40.0%  |
| Sample 5  | 28              | 2.6%   | 22.4             | 45.0%  | 28.6             | 4.1%  | 26.2                   | 25.9%  |
| Sample 6  | 31.8            | 41.5%  | 36.2             | 71.7%  | 29               | 4.9%  | 32.2                   | 42.9%  |
| Sample 7  | 42.7            | 49.6%  | 25.9             | 36.0%  | 49.6             | 43.6% | 37.3                   | 55.0%  |
| Sample 8  | 23.2            | 36.4%  | 21.1             | 44.1%  | 16.5             | 22.6% | 20.1                   | 37.1%  |
| Sample 9  | 37.4            | 51.5%  | 30.2             | 6.5%   | 24.7             | 27.2% | 30.3                   | 36.8%  |
| Sample 10 | 26.6            | 14.8%  | 23.5             | 41.4%  | 23.8             | 41.2% | 24.8                   | 29.0%  |
| Sample 11 | 22.3            | 40.7%  | 44.8             | 189.0% | 15.5             | 36.7% | 24.9                   | 115.7% |

248
